# Supplementary material for: Tumor-Targeted Fluorescent Proteinoid Nanocapsules Encapsulating Synergistic Drugs for Personalized Cancer Therapy
Source: MDPI journal article supplement (doi:10.3390/ph14070648), 2021-07-06
Supplement: s1 [file s1]

## Supplementary material

### **Tumor targeted fluorescent proteinoid nanocapsules encapsulating synergistic drugs for personalized cancer therapy**

Ella Itzhaki<sup>1</sup>, Elad Hadad<sup>1</sup>, Neta Moskovits<sup>2</sup>, Salomon M. Stemmer<sup>2,3</sup> and Shlomo Margel<sup>1\*</sup>

\* Correspondence: Shlomo Margel, Tel: + 972-3-5318861, E-mail: shlomo.margel@mail.biu.ac.il

<sup>1</sup> The Institute of Nanotechnology and Advanced Materials, Department of Chemistry, Bar-Ilan University, Ramat-Gan 5290002, Israel

<sup>2</sup> Davidoff Center, Rabin and Felsenstien Medical Center, Beilinson Campus, Petach Tikva 49100, Israel

<sup>3</sup> Sackler Faculty of Medicine, Tel Aviv University, Tel Aviv 6997801, Israel

E-mail: [Shlomo.margel@biu.ac.il](mailto:Shlomo.margel@biu.ac.il)

elaeli3543@gmail.com

neta.moskovits@gmail.com

stemmer@post.tau.ac.il

eladha300@gmail.com

**Figure S1:** HR-SEM images and histograms of P(RGD) and P(RGD)/Pal,Alp NCs. Wet diameter and size distribution histogram of hollow P(RGD) NCs and P(RGD)/Pal,Alp NCs.

**Figure S2:** FTIR spectra of Alp, Pal, P(RGD) NCs and P(RGD)/Pal,Alp NCs.

**Figure S3:** TGA thermograms of Alp, Pal, P(RGD) NCs and P(RGD)/Pal,Alp NCs.

**Figure S4:** Tumor growth as function of time. *In vivo* tumor growth inhibition in PDX mice using Pal, Alp and mixed (Pal + Alp) treatment.

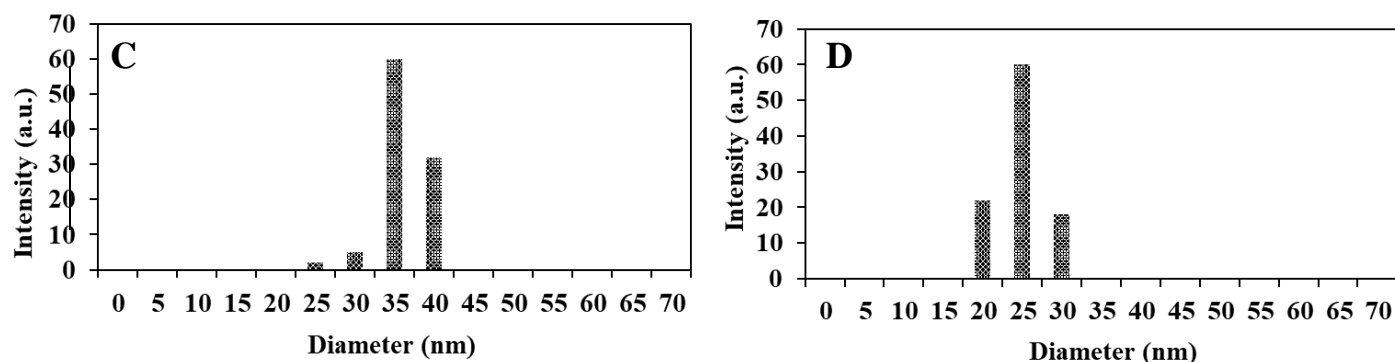

**Figure S1:** Dry diameter and size distributions obtained by HR-SEM of (A) P(RGD) and (B) P(RGD)/Pal,Alp NCs. Wet diameter and size distribution histograms obtained by cryo-TEM of (C) hollow P(RGD) NCs and (D) P(RGD)/Pal,Alp NCs.

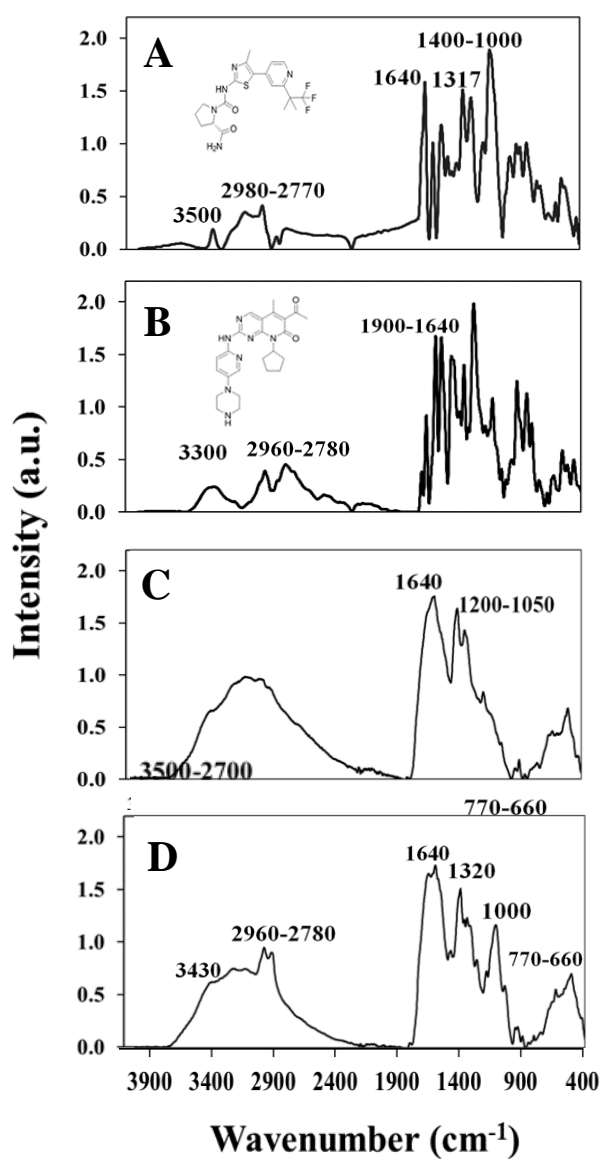

**Figure S2:** FTIR spectra of (A) Alp, (B) Pal, (C) P(RGD) NCs and (D) P(RGD)/Pal,Alp NCs.

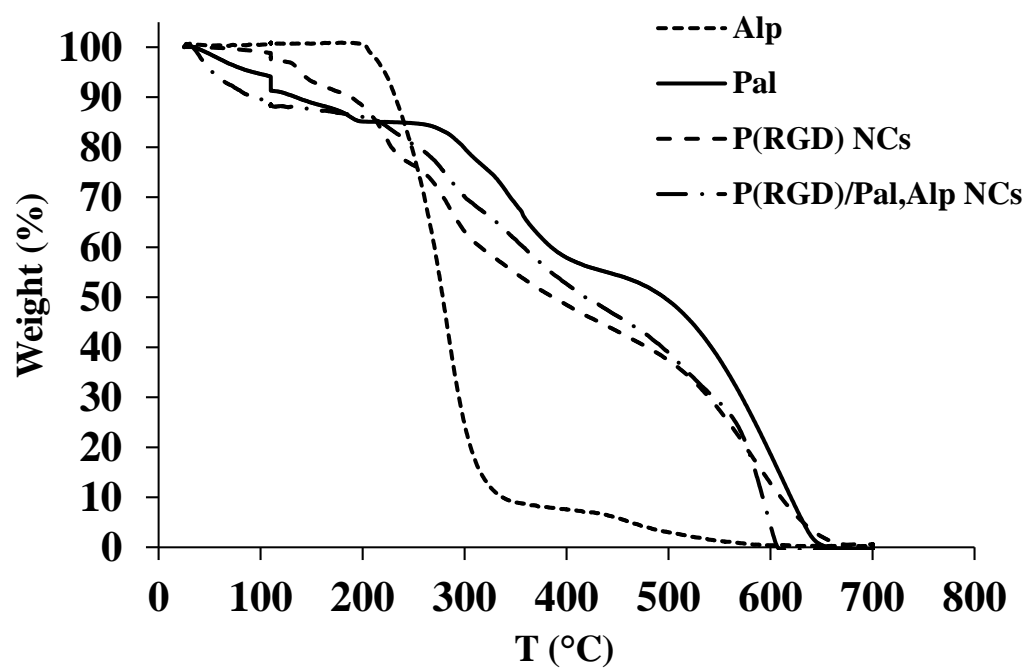

**Figure S3:** TGA thermograms of Alp, Pal, P(RGD) NCs and P(RGD)/Pal,Alp NCs.

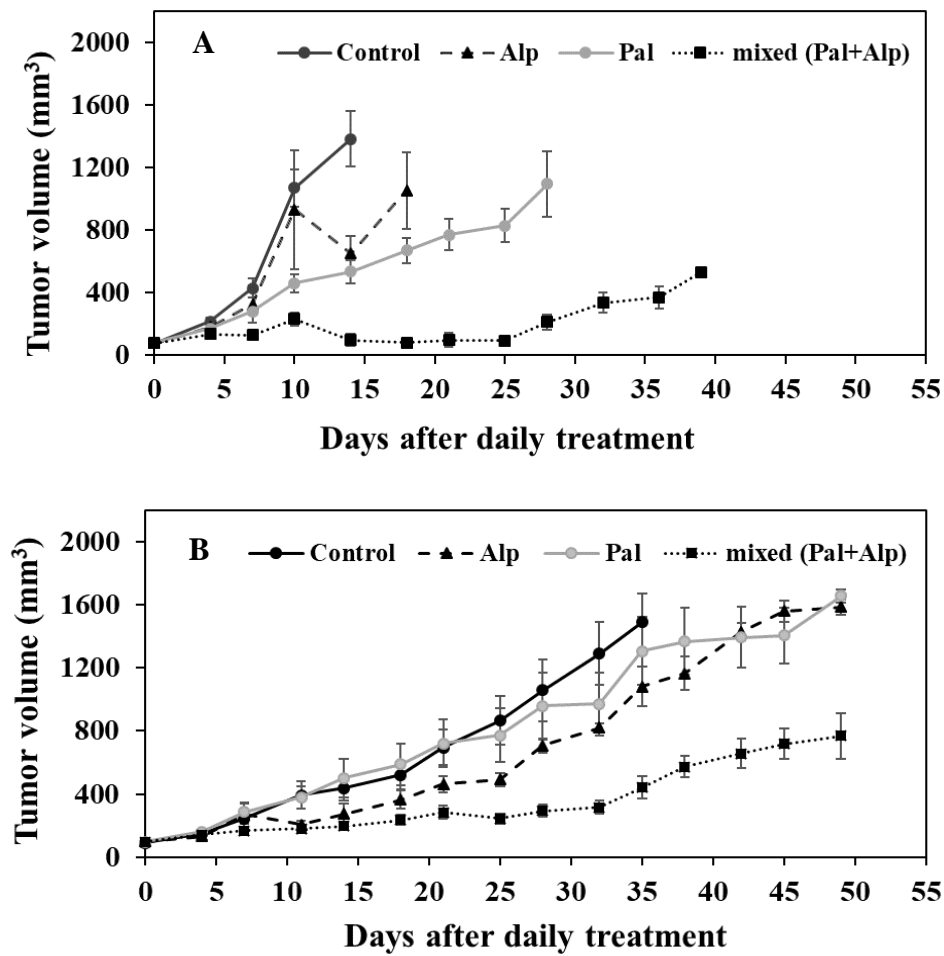

**Figure S4:** Tumor growth as function of time. *In vivo* tumor growth inhibition in PDX mice using Pal, Alp and mixed (Pal+Alp) treatment. (A) RA-300 colon cancer and (B) RA-346B stomach cancer. Tumor volumes were measured two times per week, and tumor weight was measured at end of treatment ( $n = 4$  to 5 per group at end point, note that some mice were euthanized when tumors exceeded maximum allowable size considering animal ethics).
